# Supplementary material for: Tandem gene duplication and recombination at the AT3 locus in the Solanaceae, a gene essential for capsaicinoid biosynthesis in Capsicum
Source: PLoS One. 2019 Jan 23;14(1):e0210510. doi: 10.1371/journal.pone.0210510 (PMC6343889; doi:10.1371/journal.pone.0210510)
Supplement: S3 File — Summary statistics (Sum_stats) are compiled for each data set (Ks_ex1br, Ks_ex2br, Ks_ex1ex2br) with cells in the raw estimates sheets relevant to each comparison color coded to match. The raw data are used to create Fig 6. (XLSX) [file pone.0210510.s003.xlsx]

## Sheet: Sum_stats
	Ex1br									Ex2br									Ex1Ex2br
	AT3-1 (Ex1br)	AT3-2 (Ex1br)	AT3-1/AT3-2 (Ex1br)	AT3-1/recT70 (Ex1br)	AT3-2/recT70 (Ex1br)	AT3-1/Ca-3like (Ex1br)	AT3-2/Ca-3like (Ex1br)	recT70/ca-3like (Ex1br)		AT3-1 (Ex2br)	AT3-2 (Ex2br)	AT3-1/AT3-2 (Ex2br)	AT3-1/recT70 (Ex2br)	AT3-2/recT70 (Ex2br)	AT3-1/Ca-3like (Ex2br)	AT3-2/Ca-3like (Ex2br)	recT70/ca-3like (Ex2br)		AT3-1 (Ex1Ex2br)	AT3-2 (Ex1Ex2br)	AT3-1/AT3-2 (Ex1Ex2br)	AT3-1/recT70 (Ex1Ex2br)	AT3-2/recT70 (Ex1Ex2br)	AT3-1/Ca-3like (Ex1Ex2br)	AT3-2/Ca-3like (Ex1Ex2br)	recT70/ca-3like (Ex1Ex2br)
Mean	0.0202383	0.0138857	0.48089	0.0200857	0.508108	0.21081	0.591583	0.2227		0.0171894	0.0120462	0.202878	0.252865	0.142542	0.16473	0.318767	0.3831		0.0156486	0.009528	0.316438	0.12869	0.28625	0.18552	0.427733	0.3066
Standard Error	0.000620248	0.000601918	0.00187776	0.00193021	0.00409146	0.00236425	0.00499002	0		0.000534336	0.000717753	0.000935862	0.00255861	0.00177429	0.00115497	0.00237905	0		0.000441944	0.000604851	0.000814062	0.00216927	0.00155376	0.00145118	0.00237399	0
Median	0.0194	0.0141	0.4775	0.0194	0.5135	0.2125	0.5985	0.2227		0.0167	0.0085	0.2017	0.2573	0.1425	0.1633	0.32185	0.3831		0.0136	0.00885	0.31665	0.13045	0.28675	0.1851	0.4281	0.3066
Mode	0.0194	0.0141	0.5135	0.0194	0.5135	0.2227	0.5985	#N/A		0.0167	0.0084	0.2087	0.2606	0.1425	0.1632	0.3104	#N/A		0.018	0.0044	0.325	0.1352	0.2872	0.19	0.4321	#N/A
Standard Deviation	0.00789447	0.00356099	0.0290901	0.00722217	0.0141732	0.0105732	0.0172859	#DIV/0!		0.00613905	0.00517579	0.0144983	0.0114425	0.00614632	0.00516518	0.00824129	#DIV/0!		0.00584637	0.00427695	0.0126114	0.00970127	0.00538238	0.00648988	0.00822373	#DIV/0!
Sample Variance	6.23226e-05	1.26807e-05	0.000846237	5.21598e-05	0.000200881	0.000111794	0.000298803	#DIV/0!		3.7688e-05	2.67888e-05	0.000210201	0.00013093	3.77772e-05	2.66791e-05	6.79188e-05	#DIV/0!		3.41801e-05	1.82923e-05	0.000159047	9.41146e-05	2.897e-05	4.21185e-05	6.76297e-05	#DIV/0!
Kurtosis	-0.905871	3.13546	-0.835485	-0.877915	-0.186205	-1.48125	-0.276266	#DIV/0!		-0.685625	0.331968	-0.339393	-0.798059	1.06086	2.22282	-0.352817	#DIV/0!		-0.592278	-0.781238	0.259444	-1.0913	0.993375	-1.11562	-0.693563	#DIV/0!
Skewness	0.118301	1.46496	0.0136846	-0.0654674	-0.71768	-0.268979	-0.836253	#DIV/0!		0.111506	1.13543	0.0572183	-0.046732	0.463101	1.10849	0.467992	#DIV/0!		-0.0394945	0.397097	0.322247	-0.331704	-0.00159515	0.31375	-0.18368	#DIV/0!
Range	0.03	0.014	0.1278	0.0199	0.0449	0.0283	0.0534	0		0.0261	0.0172	0.074	0.0388	0.0222	0.0219	0.0252	0		0.0232	0.0155	0.0713	0.0285	0.0208	0.0193	0.0252	0
Minimum	0.0095	0.0096	0.4242	0.0096	0.4861	0.1946	0.5644	0.2227		0.0083	0.0084	0.1716	0.2382	0.1327	0.1539	0.3104	0.3831		0.0044	0.0044	0.283	0.114	0.2759	0.1777	0.4148	0.3066
Maximum	0.0395	0.0236	0.552	0.0295	0.531	0.2229	0.6178	0.2227		0.0344	0.0256	0.2456	0.277	0.1549	0.1758	0.3356	0.3831		0.0276	0.0199	0.3543	0.1425	0.2967	0.197	0.44	0.3066
Sum	3.2786	0.486	115.414	0.2812	6.0973	4.2162	7.099	0.2227		2.269	0.6264	48.6907	5.0573	1.7105	3.2946	3.8252	0.3831		2.7385	0.4764	75.9452	2.5738	3.435	3.7104	5.1328	0.3066
Count	162	35	240	14	12	20	12	1		132	52	240	20	12	20	12	1		175	50	240	20	12	20	12	1

## Sheet: Ks_ex1br
Ks_ex1br	C_chacoense_AT3_2_FJ755164	C_frutescens_AT3_2_FJ755162	C_annuum_AT3_2_FJ755161	S_pennellii_AT3_2_FJ687531	C_annuum_AT3_2_FJ687530	C_annuum_AT3_2_FJ687524	N_benthamiana_AT3_2_FJ687525	C_frutescens_AT3_2_FJ687527	C_frutescens_AT3_2_FJ755160	C_chinense_AT3_2_FJ755163	L_dejecta_AT3_2_FJ687528	C_rhomboideum_AT3_2_FJ687529	C_rhomboideum_T70	C_frutescens_AT3_1_FJ755175	C_frutescens_AT3_1_FJ755174	C_annuum_AT3_1_FJ755173	C_chinense_Pun1_AY819027	C_frutescens_Pun1_HM854860	C_frutescens_Pun1_AY819026	N_benthamiana_AT3_1_FJ755171	C_annuum_Pun1_AY819029	D_stramonium_AT3_1_FJ755167	S_lycopersicum_AT3_1_FJ755166	C_annuum_Pun1_AY819028	S_pennellii_AT3_1_FJ755168	P_axillaris_AT3_1_FJ755169	C_chinense_Pun1_2_nonfunc_EF10	L_dejecta_T21_AT3_1	S_melongena_AT3_1_FJ755170	C_chacoense_AT3_1_FJ755176	C_chacoense_BAHD_FJ871984	C_annuum_acylsugar_NM_00132476	C_annuum_Pun1_GU300812	C_annuum_acylsugar_3like_XM_01	S_tuberosum_acylsugar_3like_XM	S_pennellii_acylsugar_3like_XM	S_lycopersicum_LOC101255851_XM	S_pennellii_acylsugar_3like_XM	S_tuberosum_acylsugar_3like_XM	S_tuberosum_acylsugar_3like_XM	N_tabacum_acylsugar_3like_XM_0	N_tabacum_acylsugar_3like_XM_0	N_sylvestris_LOC104210651_XM_0	S_lycopersicum_AC215475_46024_
C_chacoense_AT3_2_FJ755164
C_frutescens_AT3_2_FJ755162	0
C_annuum_AT3_2_FJ755161	0	0
S_pennellii_AT3_2_FJ687531	0	0	0
C_annuum_AT3_2_FJ687530	0.0141	0.0141	0.0141	0.0141
C_annuum_AT3_2_FJ687524	0.0141	0.0141	0.0141	0.0141	0
N_benthamiana_AT3_2_FJ687525	0	0	0	0	0.0141	0.0141
C_frutescens_AT3_2_FJ687527	0.0141	0.0141	0.0141	0.0141	0	0	0.0141
C_frutescens_AT3_2_FJ755160	0.0096	0.0096	0.0096	0.0096	0.0236	0.0236	0.0096	0.0236
C_chinense_AT3_2_FJ755163	0	0	0	0	0.0141	0.0141	0	0.0141	0.0096
L_dejecta_AT3_2_FJ687528	0	0	0	0	0.0141	0.0141	0	0.0141	0.0096	0
C_rhomboideum_AT3_2_FJ687529	0	0	0	0	0.0141	0.0141	0	0.0141	0.0096	0	0
C_rhomboideum_T70	0.5135	0.5135	0.5135	0.5135	0.4861	0.4861	0.5135	0.4861	0.531	0.5135	0.5135	0.5135
C_frutescens_AT3_1_FJ755175	0.5135	0.5135	0.5135	0.5135	0.4861	0.4861	0.5135	0.4861	0.531	0.5135	0.5135	0.5135	0
C_frutescens_AT3_1_FJ755174	0.5135	0.5135	0.5135	0.5135	0.4861	0.4861	0.5135	0.4861	0.531	0.5135	0.5135	0.5135	0	0
C_annuum_AT3_1_FJ755173	0.5135	0.5135	0.5135	0.5135	0.4861	0.4861	0.5135	0.4861	0.531	0.5135	0.5135	0.5135	0	0	0
C_chinense_Pun1_AY819027	0.4906	0.4906	0.4906	0.4906	0.4649	0.4649	0.4906	0.4649	0.5075	0.4906	0.4906	0.4906	0.0096	0.0096	0.0096	0.0096
C_frutescens_Pun1_HM854860	0.4906	0.4906	0.4906	0.4906	0.4649	0.4649	0.4906	0.4649	0.5075	0.4906	0.4906	0.4906	0.0096	0.0096	0.0096	0.0096	0
C_frutescens_Pun1_AY819026	0.4475	0.4475	0.4475	0.4475	0.4242	0.4242	0.4475	0.4242	0.4636	0.4475	0.4475	0.4475	0.0295	0.0295	0.0295	0.0295	0.0196	0.0196
N_benthamiana_AT3_1_FJ755171	0.4475	0.4475	0.4475	0.4475	0.4242	0.4242	0.4475	0.4242	0.4636	0.4475	0.4475	0.4475	0.0295	0.0295	0.0295	0.0295	0.0196	0.0196	0
C_annuum_Pun1_AY819029	0.4775	0.4775	0.4775	0.4775	0.4522	0.4522	0.4775	0.4522	0.4942	0.4775	0.4775	0.4775	0.0194	0.0194	0.0194	0.0194	0.0097	0.0097	0.0298	0.0298
D_stramonium_AT3_1_FJ755167	0.5135	0.5135	0.5135	0.5135	0.4861	0.4861	0.5135	0.4861	0.531	0.5135	0.5135	0.5135	0	0	0	0	0.0096	0.0096	0.0295	0.0295	0.0194
S_lycopersicum_AT3_1_FJ755166	0.4694	0.4694	0.4694	0.4694	0.4452	0.4452	0.4694	0.4452	0.4858	0.4694	0.4694	0.4694	0.0193	0.0193	0.0193	0.0193	0.0096	0.0096	0.0098	0.0098	0.0195	0.0193
C_annuum_Pun1_AY819028	0.4775	0.4775	0.4775	0.4775	0.4522	0.4522	0.4775	0.4522	0.4942	0.4775	0.4775	0.4775	0.0194	0.0194	0.0194	0.0194	0.0097	0.0097	0.0298	0.0298	0	0.0194	0.0195
S_pennellii_AT3_1_FJ755168	0.4475	0.4475	0.4475	0.4475	0.4242	0.4242	0.4475	0.4242	0.4636	0.4475	0.4475	0.4475	0.0295	0.0295	0.0295	0.0295	0.0196	0.0196	0	0	0.0298	0.0295	0.0098	0.0298
P_axillaris_AT3_1_FJ755169	0.5141	0.5141	0.5141	0.5141	0.4867	0.4867	0.5141	0.4867	0.5314	0.5141	0.5141	0.5141	0	0	0	0	0.0096	0.0096	0.0296	0.0296	0.0194	0	0.0193	0.0194	0.0296
C_chinense_Pun1_2_nonfunc_EF10	0.4906	0.4906	0.4906	0.4906	0.4649	0.4649	0.4906	0.4649	0.5075	0.4906	0.4906	0.4906	0.0096	0.0096	0.0096	0.0096	0	0	0.0196	0.0196	0.0097	0.0096	0.0096	0.0097	0.0196	0.0096
L_dejecta_T21_AT3_1	0.5135	0.5135	0.5135	0.5135	0.4861	0.4861	0.5135	0.4861	0.531	0.5135	0.5135	0.5135	0	0	0	0	0.0096	0.0096	0.0295	0.0295	0.0194	0	0.0193	0.0194	0.0295	0	0.0096
S_melongena_AT3_1_FJ755170	0.5342	0.5342	0.5342	0.5342	0.5054	0.5054	0.5342	0.5054	0.552	0.5342	0.5342	0.5342	0.0289	0.0289	0.0289	0.0289	0.0192	0.0192	0.0395	0.0395	0.0292	0.0289	0.0291	0.0292	0.0395	0.029	0.0192	0.0289
C_chacoense_AT3_1_FJ755176	0.4545	0.4545	0.4545	0.4545	0.4318	0.4318	0.4545	0.4318	0.4706	0.4545	0.4545	0.4545	0.0191	0.0191	0.0191	0.0191	0.0095	0.0095	0.0293	0.0293	0.0193	0.0191	0.0192	0.0193	0.0293	0.0191	0.0095	0.0191	0.0287
C_chacoense_BAHD_FJ871984	0.4535	0.4535	0.4535	0.4535	0.4308	0.4308	0.4535	0.4308	0.4695	0.4535	0.4535	0.4535	0.019	0.019	0.019	0.019	0.0095	0.0095	0.0293	0.0293	0.0192	0.019	0.0191	0.0192	0.0293	0.0191	0.0095	0.019	0.0287	0
C_annuum_acylsugar_NM_00132476	0.4775	0.4775	0.4775	0.4775	0.4522	0.4522	0.4775	0.4522	0.4941	0.4775	0.4775	0.4775	0.0194	0.0194	0.0194	0.0194	0.0097	0.0097	0.0298	0.0298	0	0.0194	0.0195	0	0.0298	0.0194	0.0097	0.0194	0.0292	0.0192	0.0192
C_annuum_Pun1_GU300812	0.4775	0.4775	0.4775	0.4775	0.4522	0.4522	0.4775	0.4522	0.4941	0.4775	0.4775	0.4775	0.0194	0.0194	0.0194	0.0194	0.0097	0.0097	0.0298	0.0298	0	0.0194	0.0195	0	0.0298	0.0194	0.0097	0.0194	0.0292	0.0192	0.0192	0
C_annuum_acylsugar_3like_XM_01	0.5985	0.5985	0.5985	0.5985	0.5644	0.5644	0.5985	0.5644	0.6178	0.5985	0.5985	0.5985	0.2227	0.2227	0.2227	0.2227	0.2083	0.2083	0.2125	0.2125	0.197	0.2227	0.1946	0.197	0.2125	0.2229	0.2083	0.2227	0.1996	0.2178	0.2174	0.197	0.197
S_tuberosum_acylsugar_3like_XM	0.2714	0.2714	0.2714	0.2714	0.2882	0.2882	0.2714	0.2882	0.2851	0.2714	0.2714	0.2714	0.5272	0.5272	0.5272	0.5272	0.5025	0.5025	0.4657	0.4657	0.4875	0.5272	0.4803	0.4875	0.4657	0.5276	0.5025	0.5272	0.4977	0.5016	0.51	0.4875	0.4875	0.6361
S_pennellii_acylsugar_3like_XM	0.2465	0.2465	0.2465	0.2465	0.2628	0.2628	0.2465	0.2628	0.2594	0.2465	0.2465	0.2465	0.4813	0.4813	0.4813	0.4813	0.4591	0.4591	0.4248	0.4248	0.4451	0.4813	0.4389	0.4451	0.4248	0.4816	0.4591	0.4813	0.5029	0.4915	0.4906	0.4451	0.4451	0.4869	0.1403
S_lycopersicum_LOC101255851_XM	0.2968	0.2968	0.2968	0.2968	0.3136	0.3136	0.2968	0.3136	0.3106	0.2968	0.2968	0.2968	0.4255	0.4255	0.4255	0.4255	0.4051	0.4051	0.3731	0.3731	0.3914	0.4255	0.3864	0.3914	0.3731	0.4257	0.4051	0.4255	0.4019	0.427	0.4347	0.3915	0.3915	0.5331	0.1656	0.156
S_pennellii_acylsugar_3like_XM	0.2733	0.2733	0.2733	0.2733	0.298	0.298	0.2733	0.298	0.2868	0.2733	0.2733	0.2733	0.3947	0.3947	0.3947	0.3947	0.3754	0.3754	0.3839	0.3839	0.3619	0.3947	0.3577	0.3619	0.3839	0.3948	0.3754	0.3947	0.3827	0.3966	0.4043	0.3619	0.3619	0.4891	0.1553	0.1471	0.089
S_tuberosum_acylsugar_3like_XM	0.2856	0.2856	0.2856	0.2856	0.303	0.303	0.2856	0.303	0.2991	0.2856	0.2856	0.2856	0.4587	0.4587	0.4587	0.4587	0.4374	0.4374	0.4044	0.4044	0.4235	0.4587	0.4182	0.4235	0.4044	0.4591	0.4374	0.4587	0.4796	0.4248	0.4241	0.4233	0.4233	0.4618	0.3332	0.2953	0.3193	0.2859
S_tuberosum_acylsugar_3like_XM	0.5015	0.5015	0.5015	0.5015	0.5364	0.5364	0.5015	0.5364	0.5189	0.5015	0.5015	0.5015	0.4934	0.4934	0.4934	0.4934	0.4697	0.4697	0.4832	0.4832	0.4555	0.4934	0.4484	0.4555	0.4832	0.4939	0.4697	0.4934	0.5169	0.4542	0.4532	0.4553	0.4553	0.3997	0.406	0.2804	0.4235	0.3642	0.3543
N_tabacum_acylsugar_3like_XM_0	0.5011	0.5011	0.5011	0.5011	0.5208	0.5208	0.5011	0.5208	0.494	0.5011	0.5011	0.5011	0.4535	0.4535	0.4535	0.4535	0.479	0.479	0.4912	0.4912	0.5009	0.4535	0.4566	0.5009	0.4912	0.4542	0.479	0.4535	0.5261	0.5126	0.5114	0.5009	0.5009	0.6127	0.6135	0.4873	0.5765	0.4865	0.4725	0.426
N_tabacum_acylsugar_3like_XM_0	0.565	0.565	0.565	0.565	0.5867	0.5867	0.565	0.5867	0.5554	0.565	0.565	0.565	0.4636	0.4636	0.4636	0.4636	0.4902	0.4902	0.5036	0.5036	0.5133	0.4636	0.4671	0.5133	0.5036	0.4641	0.4902	0.4636	0.539	0.5248	0.5234	0.5134	0.5134	0.709	0.6994	0.547	0.5854	0.493	0.5344	0.4819	0.0591
N_sylvestris_LOC104210651_XM_0	0.565	0.565	0.565	0.565	0.5867	0.5867	0.565	0.5867	0.5554	0.565	0.565	0.565	0.4636	0.4636	0.4636	0.4636	0.4902	0.4902	0.5036	0.5036	0.5133	0.4636	0.4671	0.5133	0.5036	0.4641	0.4902	0.4636	0.539	0.5248	0.5234	0.5134	0.5134	0.709	0.6994	0.547	0.5854	0.493	0.5344	0.4819	0.0591	0
S_lycopersicum_AC215475_46024_	1.0441	1.0441	1.0441	1.0441	1.063	1.063	1.0441	1.063	1.0492	1.0441	1.0441	1.0441	2.4086	2.4086	2.4086	2.4086	2.5433	2.5433	2.2991	2.2991	2.1741	2.4086	2.0182	2.1741	2.2991	2.427	2.5433	2.4086	2.1356	2.5182	2.4988	2.3646	2.3646	3.4646	1.9201	2.1082	1.31	1.1708	1.1779	1.4546	2.2817	1.5615	1.5615

## Sheet: Ks_ex2br
Ks_ex2br	C_chacoense_AT3_2_FJ755164	C_frutescens_AT3_2_FJ755162	C_annuum_AT3_2_FJ755161	S_pennellii_AT3_2_FJ687531	C_annuum_AT3_2_FJ687530	C_annuum_AT3_2_FJ687524	N_benthamiana_AT3_2_FJ687525	C_frutescens_AT3_2_FJ687527	C_frutescens_AT3_2_FJ755160	C_chinense_AT3_2_FJ755163	L_dejecta_AT3_2_FJ687528	C_rhomboideum_AT3_2_FJ687529	C_rhomboideum_T70	C_frutescens_AT3_1_FJ755175	C_frutescens_AT3_1_FJ755174	C_annuum_AT3_1_FJ755173	C_chinense_Pun1_AY819027	C_frutescens_Pun1_HM854860	C_frutescens_Pun1_AY819026	N_benthamiana_AT3_1_FJ755171	C_annuum_Pun1_AY819029	D_stramonium_AT3_1_FJ755167	S_lycopersicum_AT3_1_FJ755166	C_annuum_Pun1_AY819028	S_pennellii_AT3_1_FJ755168	P_axillaris_AT3_1_FJ755169	C_chinense_Pun1_2_nonfunc_EF10	L_dejecta_T21_AT3_1	S_melongena_AT3_1_FJ755170	C_chacoense_AT3_1_FJ755176	C_chacoense_BAHD_FJ871984	C_annuum_acylsugar_NM_00132476	C_annuum_Pun1_GU300812	C_annuum_acylsugar_3like_XM_01	S_tuberosum_acylsugar_3like_XM	S_pennellii_acylsugar_3like_XM	S_lycopersicum_LOC101255851_XM	S_pennellii_acylsugar_3like_XM	S_tuberosum_acylsugar_3like_XM	S_tuberosum_acylsugar_3like_XM	N_tabacum_acylsugar_3like_XM_0	N_tabacum_acylsugar_3like_XM_0	N_sylvestris_LOC104210651_XM_0	S_lycopersicum_AC215475_46024_
C_chacoense_AT3_2_FJ755164
C_frutescens_AT3_2_FJ755162	0.017
C_annuum_AT3_2_FJ755161	0.0084	0.0085
S_pennellii_AT3_2_FJ687531	0.0084	0.0085	0
C_annuum_AT3_2_FJ687530	0.0084	0.0085	0	0
C_annuum_AT3_2_FJ687524	0.0084	0.0085	0	0	0
N_benthamiana_AT3_2_FJ687525	0.0084	0.0085	0	0	0	0
C_frutescens_AT3_2_FJ687527	0.0171	0.0172	0.0085	0.0085	0.0085	0.0085	0.0085
C_frutescens_AT3_2_FJ755160	0.017	0.0171	0.0084	0.0084	0.0084	0.0084	0.0084	0
C_chinense_AT3_2_FJ755163	0	0.017	0.0084	0.0084	0.0084	0.0084	0.0084	0.0171	0.017
L_dejecta_AT3_2_FJ687528	0.0084	0.0256	0.0168	0.0168	0.0168	0.0168	0.0168	0.0256	0.0254	0.0084
C_rhomboideum_AT3_2_FJ687529	0	0.017	0.0084	0.0084	0.0084	0.0084	0.0084	0.0171	0.017	0	0.0084
C_rhomboideum_T70	0.1417	0.1549	0.1425	0.1425	0.1425	0.1425	0.1425	0.1336	0.1327	0.1417	0.1517	0.1417
C_frutescens_AT3_1_FJ755175	0.1985	0.1717	0.188	0.188	0.188	0.188	0.188	0.1791	0.178	0.1985	0.2095	0.1985	0.2383
C_frutescens_AT3_1_FJ755174	0.1985	0.1717	0.188	0.188	0.188	0.188	0.188	0.1791	0.178	0.1985	0.2095	0.1985	0.2383	0
C_annuum_AT3_1_FJ755173	0.1985	0.1717	0.188	0.188	0.188	0.188	0.188	0.1791	0.178	0.1985	0.2095	0.1985	0.2383	0	0
C_chinense_Pun1_AY819027	0.1983	0.1716	0.1878	0.1878	0.1878	0.1878	0.1878	0.179	0.1778	0.1983	0.2093	0.1983	0.2382	0	0	0
C_frutescens_Pun1_HM854860	0.2125	0.1851	0.2017	0.2017	0.2017	0.2017	0.2017	0.1928	0.1915	0.2125	0.2238	0.2125	0.254	0.0084	0.0084	0.0084	0.0084
C_frutescens_Pun1_AY819026	0.1985	0.1717	0.188	0.188	0.188	0.188	0.188	0.1791	0.178	0.1985	0.2095	0.1985	0.2383	0	0	0	0	0.0084
N_benthamiana_AT3_1_FJ755171	0.2194	0.1921	0.2087	0.2087	0.2087	0.2087	0.2087	0.1998	0.1986	0.2194	0.2306	0.2194	0.2606	0.0167	0.0167	0.0167	0.0167	0.0254	0.0167
C_annuum_Pun1_AY819029	0.2194	0.1921	0.2087	0.2087	0.2087	0.2087	0.2087	0.1998	0.1986	0.2194	0.2306	0.2194	0.2606	0.0167	0.0167	0.0167	0.0167	0.0254	0.0167	0
D_stramonium_AT3_1_FJ755167	0.234	0.2061	0.2231	0.2231	0.2231	0.2231	0.2231	0.2141	0.2127	0.234	0.2456	0.234	0.277	0.0254	0.0254	0.0254	0.0254	0.0344	0.0254	0.0083	0.0083
S_lycopersicum_AT3_1_FJ755166	0.2194	0.1921	0.2087	0.2087	0.2087	0.2087	0.2087	0.1998	0.1986	0.2194	0.2306	0.2194	0.2606	0.0167	0.0167	0.0167	0.0167	0.0254	0.0167	0	0	0.0083
C_annuum_Pun1_AY819028	0.2194	0.1921	0.2087	0.2087	0.2087	0.2087	0.2087	0.1998	0.1986	0.2194	0.2306	0.2194	0.2606	0.0167	0.0167	0.0167	0.0167	0.0254	0.0167	0	0	0.0083	0
S_pennellii_AT3_1_FJ755168	0.2194	0.1921	0.2087	0.2087	0.2087	0.2087	0.2087	0.1998	0.1986	0.2194	0.2306	0.2194	0.2606	0.0167	0.0167	0.0167	0.0167	0.0254	0.0167	0	0	0.0083	0	0
P_axillaris_AT3_1_FJ755169	0.2194	0.1921	0.2087	0.2087	0.2087	0.2087	0.2087	0.1998	0.1986	0.2194	0.2306	0.2194	0.2606	0.0167	0.0167	0.0167	0.0167	0.0254	0.0167	0	0	0.0083	0	0	0
C_chinense_Pun1_2_nonfunc_EF10	0.2034	0.1766	0.1929	0.1929	0.1929	0.1929	0.1929	0.184	0.1828	0.2034	0.2144	0.2034	0.2435	0	0	0	0	0.0084	0	0.0167	0.0167	0.0254	0.0167	0.0167	0.0167	0.0167
L_dejecta_T21_AT3_1	0.1985	0.1717	0.188	0.188	0.188	0.188	0.188	0.1791	0.178	0.1985	0.2095	0.1985	0.2383	0	0	0	0	0.0084	0	0.0167	0.0167	0.0254	0.0167	0.0167	0.0167	0.0167	0
S_melongena_AT3_1_FJ755170	0.2194	0.1921	0.2087	0.2087	0.2087	0.2087	0.2087	0.1998	0.1986	0.2194	0.2306	0.2194	0.2606	0.0167	0.0167	0.0167	0.0167	0.0254	0.0167	0	0	0.0083	0	0	0	0	0.0167	0.0167
C_chacoense_AT3_1_FJ755176	0.2124	0.185	0.2017	0.2017	0.2017	0.2017	0.2017	0.1927	0.1915	0.2124	0.2237	0.2124	0.2539	0.0084	0.0084	0.0084	0.0084	0.017	0.0084	0.0254	0.0254	0.0169	0.0254	0.0254	0.0254	0.0254	0.0084	0.0084	0.0254
C_chacoense_BAHD_FJ871984	0.2124	0.185	0.2017	0.2017	0.2017	0.2017	0.2017	0.1927	0.1915	0.2124	0.2237	0.2124	0.2538	0.0084	0.0084	0.0084	0.0084	0.017	0.0084	0.0254	0.0254	0.0169	0.0254	0.0254	0.0254	0.0254	0.0084	0.0084	0.0254	0
C_annuum_acylsugar_NM_00132476	0.2194	0.1921	0.2087	0.2087	0.2087	0.2087	0.2087	0.1998	0.1986	0.2194	0.2306	0.2194	0.2606	0.0167	0.0167	0.0167	0.0167	0.0254	0.0167	0	0	0.0083	0	0	0	0	0.0167	0.0167	0	0.0254	0.0254
C_annuum_Pun1_GU300812	0.2194	0.1921	0.2087	0.2087	0.2087	0.2087	0.2087	0.1998	0.1986	0.2194	0.2306	0.2194	0.2606	0.0167	0.0167	0.0167	0.0167	0.0254	0.0167	0	0	0.0083	0	0	0	0	0.0167	0.0167	0	0.0254	0.0254	0
C_annuum_acylsugar_3like_XM_01	0.3227	0.321	0.3104	0.3104	0.3104	0.3104	0.3104	0.3253	0.3232	0.3227	0.3356	0.3227	0.3831	0.1636	0.1636	0.1636	0.1635	0.1539	0.1636	0.1632	0.1632	0.1755	0.1632	0.1632	0.1632	0.1632	0.1634	0.1636	0.1632	0.1758	0.1757	0.1632	0.1632
S_tuberosum_acylsugar_3like_XM	0.4302	0.4307	0.4149	0.4149	0.4149	0.4149	0.4149	0.4145	0.4039	0.4302	0.4455	0.4302	0.4663	0.3183	0.3183	0.3183	0.318	0.3063	0.3183	0.3428	0.3428	0.3633	0.3428	0.3428	0.3428	0.3428	0.324	0.3183	0.3428	0.3378	0.3373	0.3428	0.3428	0.3552
S_pennellii_acylsugar_3like_XM	0.518	0.5189	0.5006	0.5006	0.5006	0.5006	0.5006	0.5012	0.4969	0.518	0.5337	0.518	0.568	0.4259	0.4259	0.4259	0.4256	0.4134	0.4259	0.4528	0.4528	0.4585	0.4528	0.4528	0.4528	0.4528	0.4324	0.4259	0.4528	0.4311	0.4304	0.4528	0.4528	0.4962	0.1757
S_lycopersicum_LOC101255851_XM	0.4561	0.4564	0.4404	0.4404	0.4404	0.4404	0.4404	0.4403	0.4371	0.4561	0.4711	0.4561	0.4743	0.3695	0.3695	0.3695	0.3693	0.3573	0.3695	0.3947	0.3947	0.3991	0.3947	0.3947	0.3947	0.3947	0.3688	0.3695	0.3947	0.3734	0.3728	0.3947	0.3947	0.4086	0.0758	0.1587
S_pennellii_acylsugar_3like_XM	0.4515	0.4516	0.436	0.436	0.436	0.436	0.436	0.4361	0.4327	0.4515	0.4664	0.4515	0.47	0.336	0.336	0.336	0.3356	0.3243	0.336	0.3601	0.3601	0.364	0.3601	0.3601	0.3601	0.3601	0.3418	0.336	0.3601	0.3395	0.3391	0.3601	0.3601	0.4014	0.1064	0.1818	0.0179
S_tuberosum_acylsugar_3like_XM	0.3982	0.3983	0.3834	0.3834	0.3834	0.3834	0.3834	0.3834	0.366	0.3982	0.4133	0.3982	0.3639	0.307	0.307	0.307	0.3067	0.3102	0.307	0.3319	0.3319	0.3201	0.3319	0.3319	0.3319	0.3319	0.3064	0.307	0.3319	0.2951	0.2947	0.3319	0.3319	0.3668	0.4209	0.5026	0.4535	0.4321
S_tuberosum_acylsugar_3like_XM	0.4677	0.4754	0.4601	0.4601	0.4601	0.4601	0.4601	0.4601	0.4634	0.4677	0.4838	0.4677	0.4321	0.3727	0.3727	0.3727	0.3723	0.3926	0.3727	0.3979	0.3979	0.4189	0.3979	0.3979	0.3979	0.3979	0.3786	0.3727	0.3979	0.3924	0.3923	0.3979	0.3979	0.4666	0.5204	0.6458	0.5224	0.5559	0.5978
N_tabacum_acylsugar_3like_XM_0	0.3944	0.4031	0.3806	0.3806	0.3806	0.3806	0.3806	0.3709	0.3747	0.3944	0.4089	0.3944	0.4365	0.3708	0.3708	0.3708	0.3704	0.3576	0.3708	0.3969	0.3969	0.3837	0.3969	0.3969	0.3969	0.3969	0.3768	0.3708	0.3969	0.3575	0.3574	0.3969	0.3969	0.4282	0.6198	0.6941	0.633	0.625	0.5483	0.4801
N_tabacum_acylsugar_3like_XM_0	0.35	0.3498	0.3368	0.3368	0.3368	0.3368	0.3368	0.3271	0.3247	0.35	0.363	0.35	0.3749	0.3221	0.3221	0.3221	0.3218	0.3102	0.3221	0.3463	0.3463	0.3344	0.3463	0.3463	0.3463	0.3463	0.3279	0.3221	0.3463	0.3101	0.31	0.3463	0.3463	0.3573	0.589	0.6953	0.5809	0.5659	0.5386	0.4821	0.1033
N_sylvestris_LOC104210651_XM_0	0.35	0.3498	0.3368	0.3368	0.3368	0.3368	0.3368	0.3271	0.3247	0.35	0.363	0.35	0.3749	0.3221	0.3221	0.3221	0.3218	0.3102	0.3221	0.3463	0.3463	0.3344	0.3463	0.3463	0.3463	0.3463	0.3279	0.3221	0.3463	0.3101	0.31	0.3463	0.3463	0.3573	0.589	0.6953	0.5809	0.5659	0.5386	0.4821	0.1033	0
S_lycopersicum_AC215475_46024_	1.4609	1.3809	1.4064	1.4064	1.4064	1.4064	1.4064	1.4265	1.3857	1.4609	1.4999	1.4609	1.7554	4.6211	4.6211	4.6211	4.3929	2.399	4.6211	2.2869	2.2869	2.506	2.2869	2.2869	2.2869	2.2869	1.3151	4.6211	2.2869	2.3614	2.5254	2.2869	2.2869	1.7116	1.6423	2.8245	1.4937	1.6177	1.7038	1.3368	2.315	1.534	1.534

## Sheet: Ks_ex1ex2br
Ks_ex1ex2Br	C_chacoense_AT3_2_FJ755164	C_frutescens_AT3_2_FJ755162	C_annuum_AT3_2_FJ755161	S_pennellii_AT3_2_FJ687531	C_annuum_AT3_2_FJ687530	C_annuum_AT3_2_FJ687524	N_benthamiana_AT3_2_FJ687525	C_frutescens_AT3_2_FJ687527	C_frutescens_AT3_2_FJ755160	C_chinense_AT3_2_FJ755163	L_dejecta_AT3_2_FJ687528	C_rhomboideum_AT3_2_FJ687529	C_rhomboideum_T70	C_frutescens_AT3_1_FJ755175	C_frutescens_AT3_1_FJ755174	C_annuum_AT3_1_FJ755173	C_chinense_Pun1_AY819027	C_frutescens_Pun1_HM854860	C_frutescens_Pun1_AY819026	N_benthamiana_AT3_1_FJ755171	C_annuum_Pun1_AY819029	D_stramonium_AT3_1_FJ755167	S_lycopersicum_AT3_1_FJ755166	C_annuum_Pun1_AY819028	S_pennellii_AT3_1_FJ755168	P_axillaris_AT3_1_FJ755169	C_chinense_Pun1_2_nonfunc_EF10	L_dejecta_T21_AT3_1	S_melongena_AT3_1_FJ755170	C_chacoense_AT3_1_FJ755176	C_chacoense_BAHD_FJ871984	C_annuum_acylsugar_NM_00132476	C_annuum_Pun1_GU300812	C_annuum_acylsugar_3like_XM_01	S_tuberosum_acylsugar_3like_XM	S_pennellii_acylsugar_3like_XM	S_lycopersicum_LOC101255851_XM	S_pennellii_acylsugar_3like_XM	S_tuberosum_acylsugar_3like_XM	S_tuberosum_acylsugar_3like_XM	N_tabacum_acylsugar_3like_XM_0	N_tabacum_acylsugar_3like_XM_0	N_sylvestris_LOC104210651_XM_0	S_lycopersicum_AC215475_46024_
C_chacoense_AT3_2_FJ755164
C_frutescens_AT3_2_FJ755162	0.0089
C_annuum_AT3_2_FJ755161	0.0044	0.0044
S_pennellii_AT3_2_FJ687531	0.0044	0.0044	0
C_annuum_AT3_2_FJ687530	0.011	0.011	0.0066	0.0066
C_annuum_AT3_2_FJ687524	0.011	0.011	0.0066	0.0066	0
N_benthamiana_AT3_2_FJ687525	0.0044	0.0044	0	0	0.0066	0.0066
C_frutescens_AT3_2_FJ687527	0.0155	0.0156	0.011	0.011	0.0044	0.0044	0.011
C_frutescens_AT3_2_FJ755160	0.0133	0.0133	0.0088	0.0088	0.0154	0.0154	0.0088	0.011
C_chinense_AT3_2_FJ755163	0	0.0089	0.0044	0.0044	0.011	0.011	0.0044	0.0155	0.0133
L_dejecta_AT3_2_FJ687528	0.0044	0.0133	0.0088	0.0088	0.0154	0.0154	0.0088	0.0199	0.0177	0.0044
C_rhomboideum_AT3_2_FJ687529	0	0.0089	0.0044	0.0044	0.011	0.011	0.0044	0.0155	0.0133	0	0.0044
C_rhomboideum_T70	0.2864	0.2967	0.2872	0.2872	0.2809	0.2809	0.2872	0.2759	0.2871	0.2864	0.2927	0.2864
C_frutescens_AT3_1_FJ755175	0.325	0.3081	0.318	0.318	0.3111	0.3111	0.318	0.306	0.3179	0.325	0.3316	0.325	0.114
C_frutescens_AT3_1_FJ755174	0.325	0.3081	0.318	0.318	0.3111	0.3111	0.318	0.306	0.3179	0.325	0.3316	0.325	0.114	0
C_annuum_AT3_1_FJ755173	0.325	0.3081	0.318	0.318	0.3111	0.3111	0.318	0.306	0.3179	0.325	0.3316	0.325	0.114	0	0
C_chinense_Pun1_AY819027	0.3173	0.3005	0.3104	0.3104	0.3036	0.3036	0.3104	0.2986	0.3103	0.3173	0.3238	0.3173	0.1197	0.0045	0.0045	0.0045
C_frutescens_Pun1_HM854860	0.3273	0.3102	0.3203	0.3203	0.3133	0.3133	0.3203	0.3081	0.3201	0.3273	0.334	0.3273	0.126	0.009	0.009	0.009	0.0045
C_frutescens_Pun1_AY819026	0.3014	0.2849	0.2946	0.2946	0.2881	0.2881	0.2946	0.283	0.2945	0.3014	0.3078	0.3014	0.1322	0.0136	0.0136	0.0136	0.009	0.0137
N_benthamiana_AT3_1_FJ755171	0.3132	0.2966	0.3064	0.3064	0.2998	0.2998	0.3064	0.2947	0.3063	0.3132	0.3198	0.3132	0.1425	0.0228	0.0228	0.0228	0.0181	0.0229	0.0091
C_annuum_Pun1_AY819029	0.3237	0.3068	0.3167	0.3167	0.3099	0.3099	0.3167	0.3048	0.3166	0.3237	0.3303	0.3237	0.1352	0.018	0.018	0.018	0.0135	0.0181	0.0228	0.0135
D_stramonium_AT3_1_FJ755167	0.3474	0.33	0.3403	0.3403	0.3329	0.3329	0.3403	0.3278	0.3401	0.3474	0.3543	0.3474	0.1302	0.0135	0.0135	0.0135	0.0181	0.0228	0.0276	0.018	0.0134
S_lycopersicum_AT3_1_FJ755166	0.3223	0.3055	0.3154	0.3154	0.3087	0.3087	0.3154	0.3036	0.3153	0.3223	0.3289	0.3223	0.1359	0.018	0.018	0.018	0.0135	0.0181	0.0136	0.0045	0.0089	0.0134
C_annuum_Pun1_AY819028	0.3237	0.3068	0.3167	0.3167	0.3099	0.3099	0.3167	0.3048	0.3166	0.3237	0.3303	0.3237	0.1352	0.018	0.018	0.018	0.0135	0.0181	0.0228	0.0135	0	0.0134	0.0089
S_pennellii_AT3_1_FJ755168	0.3132	0.2966	0.3064	0.3064	0.2998	0.2998	0.3064	0.2947	0.3063	0.3132	0.3198	0.3132	0.1425	0.0228	0.0228	0.0228	0.0181	0.0229	0.0091	0	0.0135	0.018	0.0045	0.0135
P_axillaris_AT3_1_FJ755169	0.3373	0.3202	0.3303	0.3303	0.3232	0.3232	0.3303	0.3181	0.3301	0.3373	0.344	0.3373	0.124	0.0089	0.0089	0.0089	0.0134	0.0181	0.0228	0.0134	0.0089	0.0044	0.0089	0.0089	0.0134
C_chinense_Pun1_2_nonfunc_EF10	0.3203	0.3035	0.3134	0.3134	0.3066	0.3066	0.3134	0.3015	0.3133	0.3203	0.3269	0.3203	0.1222	0.0045	0.0045	0.0045	0	0.0045	0.009	0.0181	0.0134	0.0181	0.0135	0.0134	0.0181	0.0134
L_dejecta_T21_AT3_1	0.325	0.3081	0.318	0.318	0.3111	0.3111	0.318	0.306	0.3179	0.325	0.3316	0.325	0.114	0	0	0	0.0045	0.009	0.0136	0.0228	0.018	0.0135	0.018	0.018	0.0228	0.0089	0.0045
S_melongena_AT3_1_FJ755170	0.3445	0.3272	0.3374	0.3374	0.3303	0.3303	0.3374	0.3252	0.3373	0.3445	0.3513	0.3445	0.1409	0.0225	0.0225	0.0225	0.018	0.0227	0.0274	0.0179	0.0134	0.0179	0.0134	0.0134	0.0179	0.0133	0.018	0.0225
C_chacoense_AT3_1_FJ755176	0.3156	0.2989	0.3087	0.3087	0.3021	0.3021	0.3087	0.297	0.3086	0.3156	0.3221	0.3156	0.1305	0.0135	0.0135	0.0135	0.009	0.0136	0.0182	0.0274	0.0225	0.018	0.0226	0.0225	0.0274	0.0225	0.009	0.0135	0.0271
C_chacoense_BAHD_FJ871984	0.3154	0.2987	0.3085	0.3085	0.3018	0.3018	0.3085	0.2968	0.3084	0.3154	0.3219	0.3154	0.1304	0.0135	0.0135	0.0135	0.009	0.0136	0.0182	0.0273	0.0225	0.018	0.0226	0.0225	0.0273	0.0225	0.009	0.0135	0.0271	0
C_annuum_acylsugar_NM_00132476	0.3236	0.3067	0.3167	0.3167	0.3098	0.3098	0.3167	0.3048	0.3166	0.3236	0.3302	0.3236	0.1352	0.018	0.018	0.018	0.0135	0.0181	0.0228	0.0135	0	0.0134	0.0089	0	0.0135	0.0089	0.0134	0.018	0.0134	0.0225	0.0225
C_annuum_Pun1_GU300812	0.3236	0.3067	0.3167	0.3167	0.3098	0.3098	0.3167	0.3048	0.3166	0.3236	0.3302	0.3236	0.1352	0.018	0.018	0.018	0.0135	0.0181	0.0228	0.0135	0	0.0134	0.0089	0	0.0135	0.0089	0.0134	0.018	0.0134	0.0225	0.0225	0
C_annuum_acylsugar_3like_XM_01	0.4321	0.432	0.4239	0.4239	0.4148	0.4148	0.4239	0.4242	0.439	0.4321	0.44	0.4321	0.3066	0.19	0.19	0.19	0.1839	0.1785	0.1856	0.1851	0.1782	0.197	0.1777	0.1782	0.1851	0.1897	0.1838	0.19	0.1798	0.1958	0.1956	0.1782	0.1782
S_tuberosum_acylsugar_3like_XM	0.3508	0.3502	0.3431	0.3431	0.3524	0.3524	0.3431	0.3522	0.3447	0.3508	0.3578	0.3508	0.4999	0.41	0.41	0.41	0.4006	0.3937	0.3859	0.3997	0.4079	0.4376	0.4061	0.4079	0.3997	0.4242	0.4041	0.41	0.4128	0.4141	0.4174	0.4078	0.4078	0.4677
S_pennellii_acylsugar_3like_XM	0.3796	0.3788	0.3716	0.3716	0.3806	0.3806	0.3716	0.3807	0.3771	0.3796	0.3864	0.3796	0.5339	0.4562	0.4562	0.4562	0.4464	0.4394	0.4314	0.4455	0.454	0.4741	0.452	0.454	0.4455	0.4708	0.45	0.4562	0.48	0.4645	0.4639	0.4539	0.4539	0.498	0.1611
S_lycopersicum_LOC101255851_XM	0.3794	0.3788	0.3713	0.3713	0.3805	0.3805	0.3713	0.3804	0.3768	0.3794	0.3863	0.3794	0.4579	0.3999	0.3999	0.3999	0.3909	0.3842	0.3766	0.3899	0.3978	0.4163	0.3962	0.3978	0.3899	0.4136	0.3904	0.3999	0.4028	0.4037	0.4068	0.3977	0.3977	0.4649	0.116	0.1599
S_pennellii_acylsugar_3like_XM	0.3647	0.3639	0.3569	0.3569	0.3702	0.3702	0.3569	0.3701	0.3623	0.3647	0.3715	0.3647	0.4403	0.3664	0.3664	0.3664	0.3579	0.3516	0.3618	0.3749	0.3647	0.382	0.3633	0.3647	0.3749	0.3796	0.3612	0.3664	0.374	0.3701	0.3731	0.3646	0.3646	0.4425	0.1301	0.1681	0.0503
S_tuberosum_acylsugar_3like_XM	0.3414	0.3408	0.3339	0.3339	0.3436	0.3436	0.3339	0.3434	0.3321	0.3414	0.3484	0.3414	0.4117	0.3767	0.3767	0.3767	0.368	0.3705	0.3543	0.3677	0.3751	0.3837	0.374	0.3751	0.3677	0.3906	0.3677	0.3767	0.399	0.3571	0.3566	0.375	0.375	0.4106	0.3836	0.4026	0.394	0.3659
S_tuberosum_acylsugar_3like_XM	0.4816	0.4861	0.4767	0.4767	0.4934	0.4934	0.4767	0.4931	0.486	0.4816	0.49	0.4816	0.4621	0.4247	0.4247	0.4247	0.4154	0.4283	0.4205	0.4346	0.4228	0.4521	0.4213	0.4228	0.4346	0.439	0.4189	0.4247	0.4479	0.4228	0.4223	0.4226	0.4226	0.4393	0.4736	0.4608	0.485	0.4716	0.4771
N_tabacum_acylsugar_3like_XM_0	0.4352	0.4403	0.4268	0.4268	0.437	0.437	0.4268	0.4315	0.4205	0.4352	0.443	0.4352	0.4434	0.4061	0.4061	0.4061	0.4166	0.4094	0.4217	0.4357	0.4394	0.4126	0.4221	0.4394	0.4357	0.42	0.4201	0.4061	0.4495	0.4239	0.4234	0.4393	0.4393	0.5004	0.6212	0.5969	0.6134	0.5646	0.5121	0.4549
N_tabacum_acylsugar_3like_XM_0	0.4318	0.4328	0.4234	0.4234	0.4334	0.4334	0.4234	0.4278	0.4134	0.4318	0.4395	0.4318	0.4136	0.3802	0.3802	0.3802	0.3901	0.3833	0.3948	0.4085	0.4124	0.3867	0.3957	0.4124	0.4085	0.3938	0.3935	0.3802	0.4216	0.3973	0.3968	0.4123	0.4123	0.4803	0.6392	0.6299	0.588	0.5374	0.5381	0.4822	0.0819
N_sylvestris_LOC104210651_XM_0	0.4318	0.4328	0.4234	0.4234	0.4334	0.4334	0.4234	0.4278	0.4134	0.4318	0.4395	0.4318	0.4136	0.3802	0.3802	0.3802	0.3901	0.3833	0.3948	0.4085	0.4124	0.3867	0.3957	0.4124	0.4085	0.3938	0.3935	0.3802	0.4216	0.3973	0.3968	0.4123	0.4123	0.4803	0.6392	0.6299	0.588	0.5374	0.5381	0.4822	0.0819	0
S_lycopersicum_AC215475_46024_	1.6478	1.5731	1.5965	1.5965	1.6308	1.6308	1.5965	1.7022	1.6157	1.6478	1.7125	1.6478	1.4709	1.2688	1.2688	1.2688	2.8577	2.4546	1.2697	2.6312	3.5645	2.3947	2.9939	3.5645	2.6312	2.7529	3.0229	1.2688	3.2947	2.4498	3.4121	2.2457	2.2457	2.4666	1.8789	2.5298	1.4655	1.4421	1.4696	2.3501	2.6363	1.5967	1.5967
